# Supplementary material for: Convolutional ensembles for Arabic Handwritten Character and Digit Recognition
Source: PeerJ Comput Sci. 2018 Oct 15;4:e167. doi: 10.7717/peerj-cs.167 (PMC7924465; doi:10.7717/peerj-cs.167)
Supplement: Supplemental Information 2 — This file contains the raw acurracy results (validation and testing) for all 26 runs computed: 10 using MCCV, 10 using 10-fold validation, 6 using 6-fold validation. [file peerj-cs-04-167-s002.xlsx]

## Sheet: Plan1
Acurracies:
Monte Carlo Cross Validation:											10-fold validation											6-fold Cross Validation
Validation					Test						Validation					Test						Validation					Test
VGG12	REGU	VGG12_aug	REGU_aug	ENS4	VGG12	REGU	VGG12_aug	REGU_aug	ENS4		VGG12	REGU	VGG12_aug	REGU_aug	ENS4	VGG12	REGU	VGG12_aug	REGU_aug	ENS4		VGG12	REGU	VGG12_aug	REGU_aug	ENS4	VGG12	REGU	VGG12_aug	REGU_aug	ENS4
0.9961	0.996	0.9967	0.997	0.9975	0.9928	0.9918	0.9928	0.9934	0.9942		0.9963	0.9945	0.9966	0.997	0.997	0.9926	0.9904	0.993	0.993	0.9941		0.9959	0.9967	0.9964	0.998	0.9976	0.992	0.9918	0.9934	0.9943	0.9946
0.9955	0.9958	0.9961	0.9966	0.9969	0.9919	0.9915	0.9923	0.9938	0.9948		0.9951	0.9963	0.9953	0.9956	0.9963	0.9915	0.9928	0.9928	0.9939	0.9941		0.9964	0.9954	0.9962	0.9973	0.9975	0.9928	0.9917	0.9926	0.9939	0.9941
0.9961	0.9972	0.9972	0.9982	0.9986	0.9914	0.9913	0.9929	0.9933	0.9941		0.9951	0.996	0.9961	0.9975	0.998	0.9912	0.9912	0.9928	0.995	0.9944		0.9964	0.995	0.9959	0.9963	0.9975	0.9916	0.9911	0.9932	0.9933	0.9951
0.9959	0.9962	0.9964	0.9971	0.9975	0.992	0.9921	0.9936	0.9936	0.9943		0.9968	0.9963	0.9963	0.9971	0.9973	0.9925	0.9914	0.9932	0.9946	0.9944		0.9971	0.9969	0.9972	0.9978	0.9983	0.9934	0.9915	0.9935	0.9939	0.9946
0.9952	0.9956	0.9961	0.996	0.9965	0.9916	0.9921	0.9932	0.9947	0.9941		0.9958	0.9966	0.9953	0.998	0.9976	0.9926	0.9918	0.9931	0.9944	0.9939		0.996	0.9957	0.9963	0.9971	0.9972	0.9927	0.9925	0.9933	0.9935	0.9947
0.9956	0.9957	0.9961	0.997	0.9971	0.9923	0.9913	0.9935	0.9933	0.9943		0.9966	0.9958	0.9951	0.9966	0.9971	0.9925	0.9929	0.993	0.9943	0.9943		0.9955	0.995	0.9953	0.9965	0.9962	0.993	0.9922	0.9933	0.9945	0.995
0.9952	0.9965	0.9963	0.998	0.9978	0.9914	0.9922	0.993	0.9935	0.9941		0.9963	0.9951	0.9958	0.9961	0.9973	0.9926	0.9906	0.9937	0.9938	0.9944
0.9955	0.9955	0.9954	0.9965	0.9967	0.9921	0.9913	0.9933	0.994	0.9945		0.9955	0.9956	0.996	0.9968	0.9975	0.9926	0.9928	0.9933	0.9939	0.9952
0.9948	0.9958	0.9962	0.997	0.9973	0.9919	0.992	0.9933	0.9936	0.994		0.9958	0.9962	0.997	0.9965	0.9973	0.9912	0.9903	0.9931	0.993	0.9941
0.9965	0.9966	0.9967	0.9976	0.9978	0.9927	0.9918	0.9938	0.9938	0.9949		0.9965	0.9955	0.9957	0.9975	0.9977	0.9936	0.9906	0.9929	0.9941	0.9947
